# Supplementary material for: Drug-Targeted Genomes: Mutability of Ion Channels and GPCRs
Source: MDPI journal article supplement (doi:10.3390/biomedicines10030594), 2022-03-03
Supplement: s1 [file s1]

## Supplementary Materials

Drug targeted genomes: mutability of ion channels and GPCRs

Regan Raines<sup>1</sup>, Ian McKnight<sup>1</sup>, Hunter White<sup>1</sup>, Kaitlyn Legg<sup>1</sup>, Chan Lee<sup>2</sup>,  
Wei Li<sup>3</sup>, Peter H.U. Lee<sup>4,5</sup>, Joon W. Shim<sup>1,\*</sup>

Correspondence to: [shim@marshall.edu](mailto:shim@marshall.edu)

**This file includes:**

Tables S1 to S3

**Table S1.** Two factor characteristics of 118 druggable ion channels

| Ion channels | gene ID         | chr* | gene locus | telomere locus | gene to telomere | A, T ** (%) | A + T (%) | FL*** (bp) |
|--------------|-----------------|------|------------|----------------|------------------|-------------|-----------|------------|
| 1            | <i>HTR3B</i>    | 11   | 113 MB     | 135 Mb         | 135-113=22       | 26,27       | 26+27=53  | 4406       |
| 2            | <i>HTR3E</i>    | 3    | 184 MB     | 198 Mb         | 198-184=14       | 23,25       | 23+25=48  | 1927       |
| 3            | <i>HTR3D</i>    | 3    | 184 Mb     | 198 Mb         | 14               | 22,25       | 22+25=47  | 1459       |
| 4            | <i>CHRNA2</i>   | 1    | 154 MB     | 248 MB         | 248-154=94       | 21,22       | 43        | 5857       |
| 5            | <i>HTR3C</i>    | 3    | 184 MB     | 198 Mb         | 14               | 22,25       | 47        | 1699       |
| 6            | <i>CHRNA1</i>   | 2    | 232 MB     | 242 Mb         | 10               | 21,23       | 44        | 2962       |
| 7            | <i>CHRNA1</i>   | 17   | 7 Mb       | 83 Mb          | 76               | 22,25       | 27        | 2560       |
| 8            | <i>CHRNA10</i>  | 10   | 3 Mb       | 133 MB         | 130              | 18,22       | 40        | 1945       |
| 9            | <i>CHRNA2</i>   | 8    | 27 MB      | 145 Mb         | 118              | 19,24       | 43        | 4037       |
| 10           | <i>CHRNA9</i>   | 4    | 40 MB      | 190 Mb         | 150              | 27,30       | 57        | 2272       |
| 11           | <i>CHRNA9</i>   | 2    | 232 Mb     | 242 Mb         | 10               | 23,25       | 48        | 4009       |
| 12           | <i>ASIC4</i>    | 2    | 219 Mb     | 242 MB         | 23               | 19,19       | 38        | 2589       |
| 13           | <i>ASIC5</i>    | 4    | 155 MB     | 189 Mb         | 34               | 29,32       | 61        | 1696       |
| 14           | <i>BEST4</i>    | 1    | 44 Mb      | 248 Mb         | 204              | 19,24       | 43        | 2512       |
| 15           | <i>CACNA2D1</i> | 7    | 82 MB      | 159 MB         | 77               | 31,33       | 64        | 7542       |
| 16           | <i>CACNA2D3</i> | 3    | 54 Mb      | 198 Mb         | 144              | 27,25       | 52        | 3789       |
| 17           | <i>CACNA2D4</i> | 12   | 1.8 Mb     | 133 MB         | 131.2            | 24,23       | 47        | 5285       |
| 18           | <i>CACNB1</i>   | 17   | 39 MB      | 81 Mb          | 42               | 20,21       | 41        | 3711       |
| 19           | <i>CACNB2</i>   | 10   | 18 MB      | 131 MB         | 113              | 30,30       | 60        | 6199       |
| 20           | <i>CACNB3</i>   | 12   | 48 MB      | 132 Mb         | 84               | 19,20       | 39        | 2931       |
| 21           | <i>CACNA2D2</i> | 3    | 50 MB      | 198 MB         | 148              | 22,21       | 43        | 5696       |
| 22           | <i>CACNG6</i>   | 19   | 54 Mb      | 58 MB          | 4                | 15,22       | 37        | 2288       |
| 23           | <i>CACNA1F</i>  | X    | 49 MB      | 156 MB         | 107              | 21,24       | 45        | 6039       |
| 24           | <i>CACNB4</i>   | 2    | 152 Mb     | 242 MB         | 90               | 32,34       | 66        | 7944       |
| 25           | <i>CACNG1</i>   | 17   | 67 Mb      | 81 MB          | 14               | 18,23       | 41        | 1302       |
| 26           | <i>CACNG5</i>   | 17   | 66 Mb      | 82 Mb          | 16               | 23,28       | 51        | 10576      |
| 27           | <i>CACNG3</i>   | 16   | 24 Mb      | 90 Mb          | 66               | 24,25       | 49        | 1917       |
| 28           | <i>CACNG7</i>   | 19   | 53 Mb      | 58 Mb          | 5                | 16,23       | 39        | 2754       |
| 29           | <i>CACNG4</i>   | 17   | 67 MB      | 83 MB          | 16               | 20,22       | 42        | 3583       |
| 30           | <i>CACNG8</i>   | 19   | 53 MB      | 58 MB          | 5                | 24,21       | 45        | 8850       |
| 31           | <i>CLCNKA</i>   | 1    | 16 MB      | 248 Mb         | 232              | 19,23       | 42        | 2491       |
| 32           | <i>CLIC6</i>    | 21   | 34 Mb      | 46 MB          | 12               | 24,21       | 45        | 4197       |
| 33           | <i>CLIC2</i>    | X    | 155 MB     | 156 Mb         | 1                | 35,30       | 65        | 2623       |
| 34           | <i>CLCA4</i>    | 1    | 86 Mb      | 248 Mb         | 162              | 34,29       | 63        | 3211       |
| 35           | <i>CLCC1</i>    | 1    | 108 MB     | 248 Mb         | 140              | 28,31       | 59        | 4683       |
| 36           | <i>CLCA3P</i>   | 1    | 86 MB      | 248 Mb         | 162              | 34,32       | 66        | 4339       |
| 37           | <i>CNGA4</i>    | 11   | 6.2 Mb     | 135 Mb         | 128.8            | 23,22       | 45        | 1916       |
| 38           | <i>CLCN6</i>    | 1    | 11.8 Mb    | 248 Mb         | 236.2            | 21,27       | 48        | 5589       |
| 39           | <i>CLIC5</i>    | 6    | 46 MB      | 169 Mb         | 123              | 28,28       | 56        | 5706       |
| 40           | <i>CLCA2</i>    | 1    | 86 Mb      | 248 Mb         | 162              | 31,31       | 62        | 3935       |
| 41           | <i>CLIC3</i>    | 9    | 136 Mb     | 138 MB         | 2                | 17,17       | 34        | 809        |
| 42           | <i>CATSPER4</i> | 1    | 26 Mb      | 248 Mb         | 222              | 23,23       | 46        | 1867       |
| 43           | <i>CATSPER2</i> | 15   | 43 Mb      | 101 Mb         | 58               | 27,30       | 57        | 4009       |
| 44           | <i>FAM26F</i>   | 6    | 116 Mb     | 169 Mb         | 53               | 22,24       | 46        | 1127       |
| 45           | <i>FAM26D</i>   | 6    | 116 Mb     | 169 Mb         | 53               | 22,24       | 46        | 1127       |

\* chr, chromosome; \*\* A, adenine; T, thymine; \*\*\* FL, full-length; bp, base pair

**Table S1.** Two factor characteristics of 118 druggable ion channels (continued)

| <b>Ion channels</b> | gene ID        | chr | gene locus | telomere locus | gene to telomere | A, T (%) | A + T (%) | FL (bp) |
|---------------------|----------------|-----|------------|----------------|------------------|----------|-----------|---------|
| 46                  | <i>FAM26E</i>  | 6   | 116 Mb     | 169 Mb         | 53               | 29,32    | 61        | 9787    |
| 47                  | <i>FXYD3</i>   | 19  | 35 Mb      | 58 MB          | 23               | 25,25    | 50        | 1378    |
| 48                  | <i>FXYD7</i>   | 19  | 35 Mb      | 58 MB          | 23               | 17,21    | 38        | 708     |
| 49                  | <i>FXYD6P3</i> | X   | 73 Mb      | 156 Mb         | 83               | 25,26    | 51        | 435     |
| 50                  | <i>GABRA6</i>  | 5   | 161 Mb     | 181 Mb         | 20               | 29,32    | 61        | 2450    |
| 51                  | <i>GABRG3</i>  | 15  | 27 MB      | 101 Mb         | 74               | 27,30    | 57        | 10862   |
| 52                  | <i>GABRR3</i>  | 3   | 98 MB      | 198 Mb         | 100              | 30,31    | 61        | 3113    |
| 53                  | <i>GABRB1</i>  | 4   | 47 MB      | 0              | 47               | 28,28    | 56        | 1939    |
| 54                  | <i>GABRG1</i>  | 4   | 46 MB      | 0              | 46               | 33,35    | 68        | 6758    |
| 55                  | <i>GABRP</i>   | 5   | 170 Mb     | 181 Mb         | 11               | 27,31    | 58        | 3304    |
| 56                  | <i>GABRA5</i>  | 15  | 26 Mb      | 101 Mb         | 75               | 29,27    | 56        | 2553    |
| 57                  | <i>GABRR1</i>  | 6   | 89 Mb      | 169 Mb         | 80               | 28,28    | 56        | 2742    |
| 58                  | <i>GPR89A</i>  | 1   | 145 Mb     | 248 Mb         | 103              | 26,31    | 57        | 2124    |
| 59                  | <i>GLRA3</i>   | 4   | 174 Mb     | 189 Mb         | 15               | 33,34    | 67        | 8697    |
| 60                  | <i>GLRA4</i>   | X   | 103 Mb     | 155 Mb         | 52               | 23,29    | 52        | 3396    |
| 61                  | <i>GLRB</i>    | 4   | 157 Mb     | 189 Mb         | 32               | 30,34    | 64        | 3033    |
| 62                  | <i>GPR89A</i>  | 1   | 145 Mb     | 248 Mb         | 103              | 26,31    | 57        | 2124    |
| 63                  | <i>GRID1</i>   | 10  | 86 Mb      | 133 Mb         | 47               | 23,23    | 46        | 6154    |
| 64                  | <i>GRIK3</i>   | 1   | 36 Mb      | 0 Mb           | 36               | 23,22    | 45        | 9491    |
| 65                  | <i>HCN3</i>    | 1   | 155 Mb     | 248 MB         | 93               | 18,25    | 43        | 3838    |
| 66                  | <i>KCND1</i>   | X   | 48 Mb      | 0              | 48               | 18,25    | 43        | 4718    |
| 67                  | <i>KCNK4</i>   | 11  | 64 Mb      | 134 Mb         | 70               | 14,20    | 34        | 1829    |
| 68                  | <i>KCNK7</i>   | 11  | 65 Mb      | 134 Mb         | 69               | 16,21    | 37        | 1386    |
| 69                  | <i>KCNS1</i>   | 20  | 45 MB      | 64 MB          | 19               | 23,24    | 47        | 5649    |
| 70                  | <i>KCNS2</i>   | 8   | 98 MB      | 144 Mb         | 46               | 23,29    | 52        | 5288    |
| 71                  | <i>KCNIP1</i>  | 5   | 170 Mb     | 181 Mb         | 11               | 24,24    | 48        | 2030    |
| 72                  | <i>KCNJ15</i>  | 21  | 38 MB      | 46 Mb          | 8                | 29,32    | 61        | 8399    |
| 73                  | <i>KCNMB4</i>  | 12  | 70 Mb      | 132 Mb         | 62               | 25,30    | 55        | 4717    |
| 74                  | <i>KCNK16</i>  | 12  | 132 Mb     | 132 Mb         | 0                | 23,24    | 47        | 3168    |
| 75                  | <i>ITPR2</i>   | 12  | 26 Mb      | 0              | 26               | 31,28    | 59        | 12564   |
| 76                  | <i>KCNH6</i>   | 17  | 63 Mb      | 82 Mb          | 19               | 20,20    | 40        | 3866    |
| 77                  | <i>KCNH7</i>   | 2   | 162 Mb     | 242 Mb         | 80               | 30,28    | 58        | 4262    |
| 78                  | <i>KCNH8</i>   | 8   | 19 Mb      | 0              | 19               | 28,29    | 57        | 5077    |
| 79                  | <i>KCNK12</i>  | 2   | 47 Mb      | 0              | 47               | 24,24    | 48        | 13564   |
| 80                  | <i>KCNMB3</i>  | 3   | 179 MB     | 197 Mb         | 18               | 29,33    | 62        | 6733    |
| 81                  | <i>KCNA6</i>   | 12  | 4 MB       | 0              | 4                | 24,20    | 44        | 3985    |
| 82                  | <i>KCNG2</i>   | 18  | 79 Mb      | 80 MB          | 1                | 11,18    | 29        | 1876    |
| 83                  | <i>KCNN1</i>   | 19  | 17 Mb      | 0              | 17               | 20,19    | 39        | 3633    |
| 84                  | <i>KCNAB2</i>  | 1   | 5 MB       | 0              | 5                | 19,21    | 40        | 3875    |
| 85                  | <i>KCNIP4</i>  | 4   | 20 Mb      | 0              | 20               | 32,31    | 63        | 2370    |
| 86                  | <i>KCNC4</i>   | 1   | 110 Mb     | 0              | 110              | 16,22    | 38        | 4829    |
| 87                  | <i>KCNG3</i>   | 2   | 42 Mb      | 0              | 42               | 24,30    | 54        | 3709    |
| 88                  | <i>KCNH4</i>   | 17  | 42 MB      | 82 Mb          | 40               | 18,21    | 39        | 3788    |
| 89                  | <i>KCNS3</i>   | 2   | 17 Mb      | 0              | 17               | 23,29    | 52        | 2341    |
| 90                  | <i>KCNAB3</i>  | 17  | 7 Mb       | 0              | 7                | 21,23    | 44        | 2879    |

**Table S1.** Two factor characteristics of 118 druggable ion channels (continued)

| <b>Ion channels</b> | gene ID        | chr | gene locus | telomere locus | gene to telomere | A, T (%) | A + T (%) | FL (bp) |
|---------------------|----------------|-----|------------|----------------|------------------|----------|-----------|---------|
| 91                  | <i>KCNG4</i>   | 16  | 84 Mb      | 90 Mb          | 6                | 21,25    | 46        | 5503    |
| 92                  | <i>KCNA7</i>   | 19  | 49 Mb      | 58 Mb          | 9                | 21,23    | 44        | 4151    |
| 93                  | <i>KCNT1</i>   | 9   | 135 Mb     | 138 MB         | 3                | 20,20    | 40        | 7123    |
| 94                  | <i>KCNJ14</i>  | 19  | 48 Mb      | 58 Mb          | 10               | 20,26    | 46        | 3854    |
| 95                  | <i>KCNJ18</i>  | 17  | 21 Mb      | 0              | 17               | 20,20    | 40        | 2196    |
| 96                  | <i>KCNV1</i>   | 8   | 109 MB     | 144 Mb         | 35               | 27,32    | 59        | 6912    |
| 97                  | <i>LRRC52</i>  | 1   | 165 MB     | 248 Mb         | 83               | 23,25    | 48        | 1372    |
| 98                  | <i>LRRC55</i>  | 11  | 57MB       | 134 Mb         | 77               | 26,26    | 52        | 5204    |
| 99                  | <i>LRRC38</i>  | 1   | 13 Mb      | 0              | 13               | 19,21    | 40        | 2168    |
| 100                 | <i>PANX3</i>   | 11  | 124 Mb     | 134 Mb         | 10               | 26,27    | 53        | 1729    |
| 101                 | <i>PANX2</i>   | 22  | 50 Mb      | 50.18          | 0.18             | 18,17    | 35        | 3052    |
| 102                 | <i>PLLP</i>    | 16  | 57 Mb      | 90 Mb          | 33               | 19,23    | 42        | 1497    |
| 103                 | <i>PKD1L2</i>  | 16  | 81 Mb      | 90 Mb          | 9                | 21,23    | 44        | 3451    |
| 104                 | <i>PKD2L2</i>  | 5   | 137 Mb     | 181 Mb         | 44               | 32,33    | 65        | 2214    |
| 105                 | <i>PKD1L3</i>  | 16  | 71 Mb      | 90 Mb          | 19               | 27,27    | 54        | 5623    |
| 106                 | <i>SLC26A1</i> | 4   | 0.9 Mb     | 0              | 0.9              | 15,18    | 33        | 3413    |
| 107                 | <i>SCN3B</i>   | 11  | 123 Mb     | 134 MB         | 11               | 24,29    | 53        | 6082    |
| 108                 | <i>SCN7A</i>   | 2   | 166 Mb     | 240 Mb         | 74               | 30,34    | 64        | 7465    |
| 109                 | <i>SCNN1D</i>  | 1   | 1.2 Mb     | 0              | 1.2              | 18,18    | 36        | 3050    |
| 110                 | <i>SCN2B</i>   | 11  | 118 Mb     | 134 Mb         | 16               | 23,24    | 47        | 4937    |
| 111                 | <i>SCNN1B</i>  | 16  | 23 Mb      | 0              | 23               | 21,21    | 42        | 2560    |
| 112                 | <i>TMC5</i>    | 16  | 19 Mb      | 0              | 19               | 27,29    | 56        | 3676    |
| 113                 | <i>TMC7</i>    | 16  | 18 MB      | 0              | 18               | 26,29    | 55        | 4401    |
| 114                 | <i>TMEM38B</i> | 9   | 105 MB     | 138 MB         | 33               | 30,35    | 65        | 3545    |
| 115                 | <i>TMC3</i>    | 15  | 81 Mb      | 101 Mb         | 20               | 25,26    | 51        | 4770    |
| 116                 | <i>TMC4</i>    | 19  | 54 Mb      | 58 Mb          | 4                | 16,25    | 41        | 2362    |
| 117                 | <i>TTYH2</i>   | 17  | 74 Mb      | 82 Mb          | 8                | 20,24    | 44        | 3433    |
| 118                 | <i>TTYH1</i>   | 19  | 54 Mb      | 58 Mb          | 4                | 16,22    | 38        | 2056    |

**Table S2.** Identification of 118 druggable ion channel types (30 anion channels in total)

| Ion channels | gene ID         | Gene name                                                                            | Channel type     |
|--------------|-----------------|--------------------------------------------------------------------------------------|------------------|
| 1            | <i>HTR3B</i>    | serotonin (5-HT) receptor 3B                                                         | cat- *           |
| 2            | <i>HTR3E</i>    | serotonin (5-HT) receptor 3E                                                         | cat-             |
| 3            | <i>HTR3D</i>    | serotonin (5-HT) receptor 3D                                                         | cat-             |
| 4            | <i>CHRNA2</i>   | instructor of neuronal nicotinic acetylcholine receptor (nAChR)                      | cat-             |
| 5            | <i>HTR3C</i>    | serotonin (5-HT) receptor 3C                                                         | cat-             |
| 6            | <i>CHRNA1</i>   | acetylcholine recep subunit delta                                                    | cat-             |
| 7            | <i>CHRNA1</i>   | acetylcholine recep subunit beta                                                     | cat-             |
| 8            | <i>CHRNA10</i>  | Neuronal acetylcholine receptor subunit alpha-10,                                    | cat-             |
| 9            | <i>CHRNA2</i>   | instructor of neuronal nicotinic acetylcholine receptor (nAChR)                      | cat-             |
| 10           | <i>CHRNA9</i>   | cholinergic Receptor Nicotinic Alpha 9 Subunit                                       | cat-             |
| 11           | <i>CHRNA1</i>   | instructor of gamma protein component (subunit) of the acetylcholine receptor (AChR) | cat-             |
| 12           | <i>ASIC4</i>    | Acid Sensing Ion Channel Subunit Family Member 4                                     | Na <sup>+</sup>  |
| 13           | <i>ASIC5</i>    | Acid Sensing Ion Channel Subunit Family Member 5                                     | Na <sup>+</sup>  |
| 14           | <i>BEST4</i>    | a member of the bestrophin gene family of anion channels                             | ani- **          |
| 15           | <i>CACNA2D1</i> | Calcium Voltage-Gated Channel Auxiliary Subunit Alpha2delta 1                        | cat-             |
| 16           | <i>CACNA2D3</i> | Calcium Voltage-Gated Channel Auxiliary Subunit Alpha2delta 3                        | cat-             |
| 17           | <i>CACNA2D4</i> | Calcium Voltage-Gated Channel Auxiliary Subunit Alpha2delta 4                        | cat-             |
| 18           | <i>CACNB1</i>   | Voltage-dependent L-type calcium channel subunit beta-1                              | cat-             |
| 19           | <i>CACNB2</i>   | Voltage-dependent L-type calcium channel subunit beta-2                              | cat-             |
| 20           | <i>CACNB3</i>   | Voltage-dependent L-type calcium channel subunit beta-3                              | cat-             |
| 21           | <i>CACNA2D2</i> | Calcium Voltage-Gated Channel Auxiliary Subunit Alpha2delta 2                        | cat-             |
| 22           | <i>CACNG6</i>   | Calcium Voltage-Gated Channel Auxiliary Subunit Gamma 6                              | cat-             |
| 23           | <i>CACNA1F</i>  | calcium Voltage-Gated Channel Subunit Alpha1 F                                       | cat-             |
| 24           | <i>CACNB4</i>   | calcium Voltage-Gated Channel Auxiliary Subunit Beta 4                               | cat-             |
| 25           | <i>CACNG1</i>   | Voltage-dependent calcium channel gamma-1 subunit                                    | cat-             |
| 26           | <i>CACNG5</i>   | Calcium Voltage-Gated Channel Auxiliary Subunit Gamma 5                              | cat-             |
| 27           | <i>CACNG3</i>   | Calcium Voltage-Gated Channel Auxiliary Subunit Gamma 3                              | cat-             |
| 28           | <i>CACNG7</i>   | Calcium Voltage-Gated Channel Auxiliary Subunit Gamma 7                              | cat-             |
| 29           | <i>CACNG4</i>   | Calcium Voltage-Gated Channel Auxiliary Subunit Gamma 4                              | cat-             |
| 30           | <i>CACNG8</i>   | Calcium Voltage-Gated Channel Auxiliary Subunit Gamma 8                              | cat-             |
| 31           | <i>CLCNKA</i>   | Chloride Voltage-Gated Channel Ka                                                    | Cl <sup>-</sup>  |
| 32           | <i>CLIC6</i>    | Chloride Intracellular Channel 6                                                     | Cl <sup>-</sup>  |
| 33           | <i>CLIC2</i>    | Chloride Intracellular Channel 2                                                     | Cl <sup>-</sup>  |
| 34           | <i>CLCA4</i>    | chloride channel accessory 4,                                                        | Cl <sup>-</sup>  |
| 35           | <i>CLCC1</i>    | chloride channel accessory 1                                                         | Cl <sup>-</sup>  |
| 36           | <i>CLCA3P</i>   | Chloride Channel Accessory 3, Pseudogene                                             | Cl <sup>-</sup>  |
| 37           | <i>CNGA4</i>    | Cyclic Nucleotide Gated Channel Subunit Alpha 4                                      | cat-             |
| 38           | <i>CLCN6</i>    | Cyclic Nucleotide Gated Channel Subunit Alpha 6                                      | cat-             |
| 39           | <i>CLIC5</i>    | Chloride Intracellular Channel 5                                                     | Cl <sup>-</sup>  |
| 40           | <i>CLCA2</i>    | Chloride channel accessory 2                                                         | Cl <sup>-</sup>  |
| 41           | <i>CLIC3</i>    | chloride Intracellular Channel 3                                                     | Cl <sup>-</sup>  |
| 42           | <i>CATSPER4</i> | Cation Channel Sperm Associated 4                                                    | cat-             |
| 43           | <i>CATSPER2</i> | Cation Channel Sperm Associated 2                                                    | cat-             |
| 44           | <i>FAM26F</i>   | Calcium Homeostasis Modulator Family Member 6                                        | Ca <sup>2+</sup> |
| 45           | <i>FAM26D</i>   | Calcium Homeostasis Modulator Protein 4;                                             | Ca <sup>2+</sup> |

\* cat-, cation; \*\* ani-, anion; anion channels shaded in gray

**Table S2.** Identification of 118 druggable ion channel types (continued)

| Ion channels | gene ID        | Gene name                                                                      | Channel type     |
|--------------|----------------|--------------------------------------------------------------------------------|------------------|
| 46           | <i>FAM26E</i>  | Calcium Homeostasis Modulator Family Member 5                                  | Ca <sup>2+</sup> |
| 47           | <i>FXYD3</i>   | FXYD Domain Containing Ion Transport Regulator 3                               | cat-             |
| 48           | <i>FXYD7</i>   | FXYD Domain Containing Ion Transport Regulator 7                               | cat-             |
| 49           | <i>FXYD6P3</i> | FXYD Domain Containing Ion Transport Regulator 6 Pseudogene 3                  | cat-             |
| 50           | <i>GABRA6</i>  | gamma-Aminobutyric Acid Type A Receptor Subunit Alpha6                         | Cl <sup>-</sup>  |
| 51           | <i>GABRG3</i>  | Gamma-Aminobutyric Acid Type A Receptor Subunit Gamma3                         | Cl <sup>-</sup>  |
| 52           | <i>GABRR3</i>  | Gamma-Aminobutyric Acid Type A Receptor Subunit Rho3                           | Cl <sup>-</sup>  |
| 53           | <i>GABRB1</i>  | Gamma-Aminobutyric Acid Type A Receptor Subunit Beta1                          | Cl <sup>-</sup>  |
| 54           | <i>GABRG1</i>  | Gamma-Aminobutyric Acid Type A Receptor Subunit Gamma1                         | Cl <sup>-</sup>  |
| 55           | <i>GABRP</i>   | Gamma-Aminobutyric Acid Type A Receptor Subunit Pi                             | Cl <sup>-</sup>  |
| 56           | <i>GABRA5</i>  | Gamma-Aminobutyric Acid Type A Receptor Subunit Alpha5                         | Cl <sup>-</sup>  |
| 57           | <i>GABRR1</i>  | Gamma-aminobutyric acid receptor subunit rho-1                                 | Cl <sup>-</sup>  |
| 58           | <i>GPR89A</i>  | G Protein-Coupled Receptor 89A                                                 | ani-             |
| 59           | <i>GLRA3</i>   | Glycine Receptor Alpha 3                                                       | Cl <sup>-</sup>  |
| 60           | <i>GLRA4</i>   | Glycine Receptor Alpha 4 (Pseudogene)                                          | Cl <sup>-</sup>  |
| 61           | <i>GLRB</i>    | Glycine receptor subunit beta                                                  | Cl <sup>-</sup>  |
| 62           | <i>GPR89A</i>  | G Protein-Coupled Receptor 89A                                                 | ani-             |
| 63           | <i>GRID1</i>   | Glutamate Ionotropic Receptor Delta Type Subunit 1                             | cat-             |
| 64           | <i>GRIK3</i>   | Glutamate Ionotropic Receptor Kainate Type Subunit 3                           | cat-             |
| 65           | <i>HCN3</i>    | Potassium/sodium hyperpolarization-activated cyclic nucleotide-gated channel 3 | K <sup>+</sup>   |
| 66           | <i>KCND1</i>   | Potassium Voltage-Gated Channel Subfamily D Member 1                           | K <sup>+</sup>   |
| 67           | <i>KCNK4</i>   | Potassium Two Pore Domain Channel Subfamily K Member 4                         | K <sup>+</sup>   |
| 68           | <i>KCNK7</i>   | Potassium Two Pore Domain Channel Subfamily K Member 7                         | K <sup>+</sup>   |
| 69           | <i>KCNS1</i>   | Potassium Voltage-Gated Channel Modifier Subfamily S Member 1                  | K <sup>+</sup>   |
| 70           | <i>KCNS2</i>   | Potassium Voltage-Gated Channel Modifier Subfamily S Member 2                  | K <sup>+</sup>   |
| 71           | <i>KCNIP1</i>  | Potassium Voltage-Gated Channel Interacting Protein 1                          | K <sup>+</sup>   |
| 72           | <i>KCNJ15</i>  | Potassium Inwardly Rectifying Channel Subfamily J Member 15                    | K <sup>+</sup>   |
| 73           | <i>KCNMB4</i>  | Potassium Calcium-Activated Channel Subfamily M Regulatory Beta Subunit 4      | K <sup>+</sup>   |
| 74           | <i>KCNK16</i>  | Potassium Two Pore Domain Channel Subfamily K Member 16                        | K <sup>+</sup>   |
| 75           | <i>ITPR2</i>   | Inositol 1,4,5-Trisphosphate Receptor Type 2                                   | Ca <sup>2+</sup> |
| 76           | <i>KCNH6</i>   | Potassium Voltage-Gated Channel Subfamily H Member 6                           | K <sup>+</sup>   |
| 77           | <i>KCNH7</i>   | Potassium Voltage-Gated Channel Subfamily H Member 7                           | K <sup>+</sup>   |
| 78           | <i>KCNH8</i>   | Potassium Voltage-Gated Channel Subfamily H Member 8                           | K <sup>+</sup>   |
| 79           | <i>KCNK12</i>  | Potassium Two Pore Domain Channel Subfamily K Member 12                        | K <sup>+</sup>   |
| 80           | <i>KCNMB3</i>  | Potassium Calcium-Activated Channel Subfamily M Regulatory Beta Subunit 3      | K <sup>+</sup>   |
| 81           | <i>KCNA6</i>   | Potassium Voltage-Gated Channel Subfamily A Member 6                           | K <sup>+</sup>   |
| 82           | <i>KCNG2</i>   | Potassium Voltage-Gated Channel Modifier Subfamily G Member 2                  | K <sup>+</sup>   |
| 83           | <i>KCNN1</i>   | Potassium Calcium-Activated Channel Subfamily N Member 1                       | K <sup>+</sup>   |
| 84           | <i>KCNAB2</i>  | Potassium Voltage-Gated Channel Subfamily A Regulatory Beta Subunit 2          | K <sup>+</sup>   |
| 85           | <i>KCNIP4</i>  | Potassium Voltage-Gated Channel Interacting Protein 4                          | K <sup>+</sup>   |
| 86           | <i>KCNC4</i>   | Potassium Voltage-Gated Channel Subfamily C Member 4                           | K <sup>+</sup>   |
| 87           | <i>KCNG3</i>   | Potassium Voltage-Gated Channel Modifier Subfamily G Member 3                  | K <sup>+</sup>   |
| 88           | <i>KCNH4</i>   | Potassium Voltage-Gated Channel Subfamily H Member 4                           | K <sup>+</sup>   |
| 89           | <i>KCNS3</i>   | Potassium Voltage-Gated Channel Modifier Subfamily S Member 3                  | K <sup>+</sup>   |
| 90           | <i>KCNAB3</i>  | Potassium Voltage-Gated Channel Subfamily A Regulatory Beta Subunit 3          | Ca <sup>2+</sup> |

**Table S2.** Identification of 118 druggable ion channel types (continued)

| <b>Ion channels</b> | gene ID        | Gene name                                                             | Channel type    |
|---------------------|----------------|-----------------------------------------------------------------------|-----------------|
| 91                  | <i>KCNG4</i>   | Potassium Voltage-Gated Channel Modifier Subfamily G Member 4         | K <sup>+</sup>  |
| 92                  | <i>KCNA7</i>   | Potassium Voltage-Gated Channel Subfamily A Member 7                  | K <sup>+</sup>  |
| 93                  | <i>KCNT1</i>   | a sodium-activated potassium channel subunit                          | K <sup>+</sup>  |
| 94                  | <i>KCNJ14</i>  | Potassium Inwardly Rectifying Channel Subfamily J Member 14           | K <sup>+</sup>  |
| 95                  | <i>KCNJ18</i>  | Potassium Inwardly Rectifying Channel Subfamily J Member 18           | K <sup>+</sup>  |
| 96                  | <i>KCNV1</i>   | Potassium Voltage-Gated Channel Modifier Subfamily V Member 1         | K <sup>+</sup>  |
| 97                  | <i>LRRC52</i>  | Leucine Rich Repeat Containing 52                                     | K <sup>+</sup>  |
| 98                  | <i>LRRC55</i>  | Leucine Rich Repeat Containing 55                                     | K <sup>+</sup>  |
| 99                  | <i>LRRC38</i>  | Leucine Rich Repeat Containing 38                                     | K <sup>+</sup>  |
| 100                 | <i>PANX3</i>   | Pannexin 3                                                            | cat-            |
| 101                 | <i>PANX2</i>   | Pannexin 2                                                            | cat-            |
| 102                 | <i>PLLP</i>    | plasmolipin                                                           | K <sup>+</sup>  |
| 103                 | <i>PKD1L2</i>  | Polycystin 1 Like 2 (Gene/Pseudogene                                  | cat-            |
| 104                 | <i>PKD2L2</i>  | Polycystin 2 Like 2, Transient Receptor Potential Cation Channel      | cat-            |
| 105                 | <i>PKD1L3</i>  | Polycystin 1 Like 3, Transient Receptor Potential Channel Interacting | cat-            |
| 106                 | <i>SLC26A1</i> | Solute Carrier Family 26 Member 1                                     | ani-            |
| 107                 | <i>SCN3B</i>   | Sodium Voltage-Gated Channel Beta Subunit 3                           | Na <sup>+</sup> |
| 108                 | <i>SCN7A</i>   | Sodium Voltage-Gated Channel Alpha Subunit 7                          | Na <sup>+</sup> |
| 109                 | <i>SCNN1D</i>  | Sodium Channel Epithelial 1 Subunit Delta                             | Na <sup>+</sup> |
| 110                 | <i>SCN2B</i>   | Sodium Voltage-Gated Channel Beta Subunit 2                           | Na <sup>+</sup> |
| 111                 | <i>SCNN1B</i>  | the $\beta$ subunit of the epithelial sodium channel ENaC             | Na <sup>+</sup> |
| 112                 | <i>TMC5</i>    | Transmembrane Channel Like 5                                          | Cl <sup>-</sup> |
| 113                 | <i>TMC7</i>    | Transmembrane Channel Like 7                                          | Cl <sup>-</sup> |
| 114                 | <i>TMEM38B</i> | Transmembrane Protein 38B                                             | cat-            |
| 115                 | <i>TMC3</i>    | Transmembrane Channel Like 3                                          | Cl <sup>-</sup> |
| 116                 | <i>TMC4</i>    | Transmembrane Channel Like 4                                          | Cl <sup>-</sup> |
| 117                 | <i>TTYH2</i>   | Tweety Family Member 2                                                | Cl <sup>-</sup> |
| 118                 | <i>TTYH1</i>   | Tweety Family Member 1                                                | Cl <sup>-</sup> |

**Table S3.** Two factor characteristics of 143 druggable GPCRs

| GPCRs | gene ID        | chr | gene locus | telomere locus | gene to telomere | A, T (%) | A + T (%) | FL (bp) |
|-------|----------------|-----|------------|----------------|------------------|----------|-----------|---------|
| 1     | <i>HTR1E</i>   | 6   | 86 Mb      | 169 Mb         | 83               | 24,26    | 50        | 870     |
| 2     | <i>HTR5A</i>   | 7   | 155 Mb     | 158 MB         | 3                | 26,29    | 55        | 924     |
| 3     | <i>ADGRD1</i>  | 12  | 130 Mb     | 131 MB         | 1                | 21,25    | 46        | 924     |
| 4     | <i>ADGRE2</i>  | 19  | 14 Mb      | 0              | 14               | 25,27    | 52        | 930     |
| 5     | <i>ADGRF5</i>  | 6   | 46 Mb      | 0              | 46               | 29,28    | 57        | 944     |
| 6     | <i>ADGRG4</i>  | X   | 136 Mb     | 155 Mb         | 19               | 29,30    | 59        | 945     |
| 7     | <i>ADGRG7</i>  | 3   | 100 Mb     | 197 Mb         | 97               | 30,31    | 61        | 954     |
| 8     | <i>ADGRB2</i>  | 1   | 31 MB      | 0              | 31               | 16,20    | 36        | 957     |
| 9     | <i>ADGRF2</i>  | 6   | 47 MB      | 0              | 47               | 27,31    | 58        | 960     |
| 10    | <i>ADGRF4</i>  | 6   | 47 MB      | 0              | 47               | 27,29    | 56        | 997     |
| 11    | <i>CHRM5</i>   | 15  | 33 Mb      | 0              | 33               | 28,28    | 56        | 1000    |
| 12    | <i>ADGRF1</i>  | 6   | 47 MB      | 0              | 47               | 29,27    | 56        | 1000    |
| 13    | <i>ADGRG3</i>  | 16  | 57 MB      | 0              | 57               | 19,24    | 43        | 1002    |
| 14    | <i>ADGRG5</i>  | 16  | 57 MB      | 0              | 57               | 19,24    | 43        | 1017    |
| 15    | <i>ADGRD2</i>  | 9   | 124 MB     | 0              | 124              | 15,19    | 34        | 1021    |
| 16    | <i>ADGRE1</i>  | 19  | 6 MB       | 0              | 6                | 25,27    | 52        | 1027    |
| 17    | <i>ADGRE3</i>  | 19  | 14 Mb      | 0              | 14               | 26,28    | 54        | 1033    |
| 18    | <i>ADGRF3</i>  | 2   | 26 Mb      | 0              | 26               | 23,24    | 47        | 1043    |
| 19    | <i>ADGRG2</i>  | X   | 19 MB      | 0              | 19               | 27,31    | 58        | 1048    |
| 20    | <i>ADGRB3</i>  | 6   | 68 MB      | 0              | 68               | 29,29    | 58        | 1060    |
| 21    | <i>ADGRA1</i>  | 10  | 133 Mb     | 0              | 133              | 24,37    | 71        | 1074    |
| 22    | <i>ADGRE4P</i> | 19  | 6 Mb       | 0              | 6                | 26,28    | 54        | 1075    |
| 23    | <i>ADGRL3</i>  | 4   | 61 MB      | 0              | 61               | 30,31    | 61        | 1078    |
| 24    | <i>CELSR2</i>  | 1   | 109 Mb     | 0              | 109              | 18,22    | 40        | 1085    |
| 25    | <i>GPR137</i>  | 11  | 64 Mb      | 0              | 64               | 14,23    | 37        | 1096    |
| 26    | <i>FZD10</i>   | 12  | 130 Mb     | 0              | 130              | 20,23    | 43        | 1101    |
| 27    | <i>GPR32P1</i> | 19  | 50 MB      | 0              | 50               | 29,24    | 53        | 1137    |
| 28    | <i>GALR3</i>   | 22  | 37 Mb      | 0              | 37               | 10,18    | 28        | 1147    |
| 29    | <i>GPR139</i>  | 16  | 20 Mb      | 0              | 20               | 26,31    | 57        | 1151    |
| 30    | <i>GPR149</i>  | 3   | 154 Mb     | 0              | 154              | 30,32    | 62        | 1198    |
| 31    | <i>GPR171</i>  | 3   | 151 Mb     | 0              | 151              | 32,32    | 64        | 1236    |
| 32    | <i>GPR174</i>  | X   | 79 Mb      | 155 MB         | 76               | 28,36    | 64        | 1240    |
| 33    | <i>GPR142</i>  | 17  | 74 Mb      | 82 Mb          | 8                | 18,22    | 40        | 1261    |
| 34    | <i>GPR151</i>  | 5   | 146 Mb     | 181 Mb         | 35               | 29,32    | 61        | 1269    |
| 35    | <i>GPR156</i>  | 3   | 120 Mb     | 0              | 120              | 23,25    | 48        | 1269    |
| 36    | <i>GPRC5D</i>  | 12  | 12 MB      | 0              | 12               | 22,27    | 49        | 1289    |
| 37    | <i>GPR153</i>  | 1   | 6 Mb       | 0              | 6                | 15,19    | 34        | 1311    |
| 38    | <i>GPR33</i>   | 14  | 31 Mb      | 106 Mb         | 75               | 26,33    | 59        | 1347    |
| 39    | <i>GPR25</i>   | 1   | 200 Mb     | 247 MB         | 47               | 9,19     | 28        | 1398    |
| 40    | <i>GPR45</i>   | 2   | 105 MB     | 241 Mb         | 136              | 19,24    | 43        | 1408    |
| 41    | <i>GPR75</i>   | 2   | 53 MB      | 0              | 53               | 23,29    | 52        | 1428    |
| 42    | <i>GPR88</i>   | 1   | 100 Mb     | 0              | 100              | 22,27    | 49        | 1429    |
| 43    | <i>GNRHR2</i>  | 1   | 145 MB     | 248 MB         | 103              | 22,26    | 48        | 1444    |
| 44    | <i>GPR150</i>  | 5   | 95 Mb      | 181 Mb         | 86               | 14,23    | 37        | 1450    |
| 45    | <i>GPR18</i>   | 13  | 99 Mb      | 114 Mb         | 15               | 29,31    | 60        | 1493    |
| 46    | <i>GPR62</i>   | 3   | 51 Mb      | 0 Mb           | 51               | 16,20    | 36        | 1493    |
| 47    | <i>GPR82</i>   | X   | 41 MB      | 0              | 41               | 33,33    | 66        | 1564    |
| 48    | <i>GPR87</i>   | 3   | 151 Mb     | 197            | 46               | 28,32    | 55        | 1564    |



**Table S3.** Two factor characteristics of 143 druggable GPCRs (continued)

| GPCRs | gene ID        | chr | gene locus | telomere locus | gene to telomere | A, T (%) | A + T (%) | FL (bp) |
|-------|----------------|-----|------------|----------------|------------------|----------|-----------|---------|
| 49    | <i>GPR101</i>  | X   | 137 MB     | 156 Mb         | 19               | 29,29    | 58        | 1571    |
| 50    | <i>GPR173</i>  | X   | 53 MB      | 0              | 53               | 20,24    | 44        | 1582    |
| 51    | <i>GPRC5C</i>  | 17  | 74 Mb      | 83 MB          | 9                | 17,23    | 40        | 1586    |
| 52    | <i>GPR32</i>   | 19  | 50 MB      | 58 MB          | 8                | 17,29    | 46        | 1626    |
| 53    | <i>GPR63</i>   | 6   | 96 Mb      | 169 Mb         | 73               | 26,36    | 62        | 1637    |
| 54    | <i>GPRC5B</i>  | 16  | 19 MB      | 0              | 19               | 23,27    | 50        | 1637    |
| 55    | <i>GPR12</i>   | 13  | 26 MB      | 113 MB         | 87               | 27,32    | 59        | 1645    |
| 56    | <i>GPR135</i>  | 14  | 59 Mb      | 106 Mb         | 47               | 26,28    | 54        | 1647    |
| 57    | <i>GPR141</i>  | 7   | 37 Mb      | 0              | 37               | 29,35    | 64        | 1665    |
| 58    | <i>GPR146</i>  | 7   | 1 Mb       | 0              | 1                | 20,22    | 42        | 1725    |
| 59    | <i>GPR152</i>  | 11  | 67 MB      | 134 MB         | 67               | 15,21    | 36        | 1783    |
| 60    | <i>GPR157</i>  | 1   | 9 MB       | 0              | 9                | 22,25    | 47        | 1788    |
| 61    | <i>GPR160</i>  | 3   | 170 Mb     | 197 Mb         | 27               | 28,33    | 61        | 1810    |
| 62    | <i>GPR42</i>   | 19  | 35 Mb      | 58 Mb          | 23               | 19,22    | 41        | 1815    |
| 63    | <i>GPR52</i>   | 1   | 174 MB     | 248 Mb         | 74               | 24,34    | 58        | 1820    |
| 64    | <i>GPR143</i>  | X   | 9 Mb       | 0              | 9                | 20,26    | 46        | 1826    |
| 65    | <i>GPR162</i>  | 12  | 6 Mb       | 0              | 6                | 19,20    | 39        | 1850    |
| 66    | <i>GPR26</i>   | 10  | 123 Mb     | 133 Mb         | 10               | 25,27    | 52        | 1884    |
| 67    | <i>GPR21</i>   | 9   | 123 MB     | 138 MB         | 15               | 21,32    | 53        | 1890    |
| 68    | <i>GPR61</i>   | 1   | 109 Mb     | 0              | 109              | 23,27    | 50        | 1910    |
| 69    | <i>GPR20</i>   | 8   | 141 Mb     | 144 Mb         | 3                | 16,21    | 37        | 1962    |
| 70    | <i>GPR27</i>   | 3   | 71 Mb      | 0              | 71               | 18,26    | 44        | 2056    |
| 71    | <i>GPR31</i>   | 6   | 167 Mb     | 170 Mb         | 3                | 22,29    | 51        | 2056    |
| 72    | <i>GPR34</i>   | X   | 41 Mb      | 0              | 41               | 33,33    | 66        | 2060    |
| 73    | <i>GPR39</i>   | 2   | 132 Mb     | 242            | 110              | 22,24    | 46        | 2094    |
| 74    | <i>GPR4</i>    | 10  | 45 Mb      | 135            | 90               | 20,24    | 44        | 2119    |
| 75    | <i>GPR6</i>    | 6   | 109 Mb     | 171            | 62               | 18,24    | 42        | 2339    |
| 76    | <i>GPR78</i>   | 4   | 8 Mb       | 0              | 8                | 18,24    | 42        | 2344    |
| 77    | <i>GPR85</i>   | 7   | 113 Mb     | 159            | 46               | 28,31    | 59        | 2346    |
| 78    | <i>GPR19</i>   | 12  | 12 Mb      | 0              | 12               | 27,32    | 59        | 2349    |
| 79    | <i>GPR22</i>   | 7   | 107 Mb     | 159            | 52               | 35,32    | 67        | 2351    |
| 80    | <i>HCAR1</i>   | 12  | 122 Mb     | 132            | 10               | 23,29    | 52        | 2417    |
| 81    | <i>HCAR3</i>   | 12  | 122 Mb     | 132            | 10               | 23,27    | 50        | 2533    |
| 82    | <i>MAS1L</i>   | 6   | 29 Mb      | 0              | 29               | 21,30    | 51        | 2576    |
| 83    | <i>LPAR6</i>   | 13  | 48 Mb      | 114            | 66               | 31,32    | 63        | 2609    |
| 84    | <i>MRGPRX4</i> | 11  | 18 Mb      | 0              | 18               | 20,29    | 49        | 2642    |
| 85    | <i>MRGPRG</i>  | 11  | 3 Mb       | 0              | 3                | 10,22    | 32        | 2709    |
| 86    | <i>MRGPRX2</i> | 11  | 19 Mb      | 0              | 19               | 23,32    | 55        | 2732    |
| 87    | <i>MTNR1A</i>  | 4   | 186 Mb     | 190            | 4                | 19,23    | 42        | 2734    |
| 88    | <i>MRGPRE</i>  | 11  | 3 Mb       | 0              | 3                | 18,20    | 38        | 2970    |
| 89    | <i>MRGPRX3</i> | 11  | 18 Mb      | 0              | 18               | 19,29    | 48        | 2988    |
| 90    | <i>NPBWR1</i>  | 8   | 52 Mb      | 145            | 93               | 20,26    | 46        | 3005    |
| 91    | <i>NPBWR2</i>  | 20  | 64 Mb      | 64             | 0                | 17,22    | 39        | 3047    |
| 92    | <i>NPY6R</i>   | 5   | 137 Mb     | 181            | 44               | 30,30    | 60        | 3052    |
| 93    | <i>NPY2R</i>   | 4   | 155 Mb     | 190            | 35               | 28,32    | 60        | 3112    |
| 94    | <i>NPY5R</i>   | 4   | 163 Mb     | 190            | 27               | 29,34    | 63        | 3128    |
| 95    | <i>OPN1MW2</i> | x   | 154 Mb     | 156            | 2                | 19,25    | 44        | 3128    |
| 96    | <i>OXGR1</i>   | 13  | 97 Mb      | 114            | 17               | 27,32    | 59        | 3231    |

**Table S3.** Two factor characteristics of 143 druggable GPCRs (continued)

| GPCRs | gene ID        | chr | gene locus | telomere locus | gene to telomere | A, T (%) | A + T (%) | FL (bp) |
|-------|----------------|-----|------------|----------------|------------------|----------|-----------|---------|
| 97    | <i>P2RY10</i>  | X   | 79 Mb      | 156            | 77               | 29,34    | 63        | 3277    |
| 98    | <i>OXER1</i>   | 2   | 42 Mb      | 0              | 42               | 16,22    | 38        | 3318    |
| 99    | <i>RRH</i>     | 4   | 110 Mb     | 190            | 80               | 28,35    | 63        | 3323    |
| 100   | <i>P2RY11</i>  | 19  | 10 Mb      | 0              | 10               | 18,17    | 35        | 3492    |
| 101   | <i>PROKR1</i>  | 2   | 68 Mb      | 0              | 68               | 24,28    | 52        | 3517    |
| 102   | <i>QRFPR</i>   | 4   | 121 Mb     | 190            | 69               | 26,26    | 52        | 3619    |
| 103   | <i>GPCR5A</i>  | 12  | 13 Mb      | 0              | 13               | 21,31    | 52        | 3644    |
| 104   | <i>RXFP3</i>   | 5   | 34 Mb      | 0              | 34               | 19,20    | 39        | 3752    |
| 105   | <i>RXFP4</i>   | 1   | 156 Mb     | 248            | 92               | 16,25    | 41        | 3807    |
| 106   | <i>S1PR4</i>   | 19  | 3 Mb       | 0              | 3                | 13,20    | 33        | 3837    |
| 107   | <i>SSTR4</i>   | 20  | 23 Mb      | 0              | 23               | 21,24    | 45        | 3926    |
| 108   | <i>SUCNR1</i>  | 3   | 152 Mb     | 198            | 46               | 31,35    | 66        | 4088    |
| 109   | <i>TAS2R31</i> | 12  | 11 Mb      | 0              | 11               | 26,35    | 61        | 4108    |
| 110   | <i>TAS2R14</i> | 12  | 11 Mb      | 0              | 11               | 26,35    | 61        | 4181    |
| 111   | <i>TAAR3</i>   | 6   | 132 Mb     | 171            | 39               | 26,34    | 60        | 4198    |
| 112   | <i>TAS2R10</i> | 12  | 10 Mb      | 0              | 10               | 29,36    | 65        | 4209    |
| 113   | <i>TAS2R41</i> | 7   | 143 Mb     | 159            | 16               | 19,32    | 51        | 4250    |
| 114   | <i>TAS2R43</i> | 12  | 11 Mb      | 0              | 11               | 27,35    | 62        | 4287    |
| 115   | <i>TAS2R50</i> | 12  | 10 Mb      | 0              | 10               | 26,36    | 62        | 4343    |
| 116   | <i>TAAR2</i>   | 6   | 132 Mb     | 171            | 39               | 25,36    | 61        | 4555    |
| 117   | <i>TAAR8</i>   | 6   | 132 Mb     | 171            | 39               | 24,36    | 60        | 4573    |
| 118   | <i>TAS2R19</i> | 12  | 11 Mb      | 0              | 11               | 26,35    | 61        | 4622    |
| 119   | <i>TAS2R7</i>  | 12  | 10 Mb      | 0              | 10               | 28,33    | 61        | 4675    |
| 120   | <i>TAS2R9</i>  | 12  | 10 Mb      | 0              | 10               | 27,34    | 61        | 4769    |
| 121   | <i>TAS2R13</i> | 12  | 10 Mb      | 0              | 10               | 31,34    | 65        | 4787    |
| 122   | <i>TAS2R20</i> | 12  | 10 Mb      | 0              | 10               | 29,36    | 65        | 4832    |
| 123   | <i>TAS2R40</i> | 7   | 143 Mb     | 159            | 16               | 24,29    | 53        | 4851    |
| 124   | <i>TAS2R60</i> | 7   | 143 Mb     | 159            | 16               | 21,32    | 53        | 5018    |
| 125   | <i>TAS2R3</i>  | 7   | 141 Mb     | 159            | 18               | 23,32    | 55        | 5026    |
| 126   | <i>TAS2R4</i>  | 7   | 141 Mb     | 159            | 18               | 28,34    | 62        | 5144    |
| 127   | <i>TAS2R5</i>  | 7   | 141 Mb     | 159            | 18               | 21,32    | 53        | 5197    |
| 128   | <i>TAS2R16</i> | 7   | 122 Mb     | 159            | 37               | 25,34    | 59        | 5241    |
| 129   | <i>TAS2R8</i>  | 12  | 10 Mb      | 0              | 10               | 31,34    | 65        | 5390    |
| 130   | <i>TAAR9</i>   | 6   | 132 Mb     | 171            | 39               | 25,34    | 59        | 5494    |
| 131   | <i>TAS2R39</i> | 7   | 143 MB     | 158 MB         | 15               | 24,33    | 57        | 5527    |
| 132   | <i>TAS2R1</i>  | 5   | 9 MB       | 0              | 9                | 27,34    | 61        | 5705    |
| 133   | <i>TAS2R30</i> | 12  | 11 Mb      | 0              | 11               | 25,36    | 61        | 5741    |
| 134   | <i>TAS2R42</i> | 12  | 11 Mb      | 0              | 11               | 26,36    | 62        | 5802    |
| 135   | <i>TAS2R46</i> | 12  | 11 Mb      | 0              | 11               | 27,35    | 62        | 5967    |
| 136   | <i>TPRA1</i>   | 3   | 127 MB     | 197 MB         | 70               | 20,25    | 45        | 6090    |
| 137   | <i>AVPR1B</i>  | 1   | 206 MB     | 248 MB         | 42               | 22,25    | 47        | 6582    |
| 138   | <i>VN1R17P</i> | 1   | 247 MB     | 248 MB         | 1                | no exon  | no exon   | 6791    |
| 139   | <i>VN1R3</i>   | 16  | 31 Mb      | 0              | 31               | 25,33    | 58        | 8032    |
| 140   | <i>VN1R5</i>   | 1   | 247 MB     | 248 MB         | 1                | 24,34    | 58        | 9933    |
| 141   | <i>VN1R1</i>   | 19  | 57 MB      | 58 MB          | 1                | 27,33    | 60        | 10306   |
| 142   | <i>VN1R4</i>   | 19  | 53 MB      | 58 MB          | 5                | 22,31    | 53        | 11015   |
| 143   | <i>VN1R2</i>   | 19  | 53 MB      | 58 MB          | 5                | 23,32    | 55        | 13516   |
